# Supplementary material for: Two-dimensional CuAg/Ti3C2 catalyst for electrochemical synthesis of ammonia under ambient conditions: a combined experimental and theoretical study
Source: Royal Society of Chemistry journal article supplement (doi:10.1039/d0se00915f), 2020-01-01
Supplement: d0se00915f1.pdf [file d0se00915f1.pdf]

## Supporting information

### **Two-Dimensional CuAg/Ti<sub>3</sub>C<sub>2</sub> Catalyst for Electrochemical Synthesis of Ammonia under Ambient Conditions: a combined Experimental and Theoretical Study**

Anmin Liu<sup>a,\*</sup>, Qiyue Yang<sup>a</sup>, Xuefeng Ren<sup>d</sup>, Mengfan Gao<sup>a</sup>, Yanan Yang<sup>a</sup>, Liguo  
Gao<sup>a</sup>, Yanqiang Li<sup>a</sup>, Yingyuan Zhao<sup>e</sup>, Xingyou Liang<sup>a</sup>,  
Tingli Ma<sup>b, c, \*</sup>

<sup>a</sup> State Key Laboratory of Fine Chemicals, School of Chemical Engineering, Dalian  
University of Technology, China.

E-mail: [liuanmin@dlut.edu.cn](mailto:liuanmin@dlut.edu.cn), [anmin0127@163.com](mailto:anmin0127@163.com)

<sup>b</sup> Department of Materials Science and Engineering, China Jiliang University,  
Hangzhou, 310018, China.

<sup>c</sup> Graduate School of Life Science and Systems Engineering, Kyushu Institute of  
Technology, 2-4 Hibikino, Wakamatsu, Kitakyushu, Fukuoka 808-0196, Japan.

E-mail: [tinglima@life.kyutech.ac.jp](mailto:tinglima@life.kyutech.ac.jp)

<sup>d</sup> School of Ocean Science and Technology, Dalian University of Technology, Panjin,  
124221, China.

<sup>e</sup> College of Chemical Engineering and Safety, Binzhou University, Binzhou, 256603,  
China.

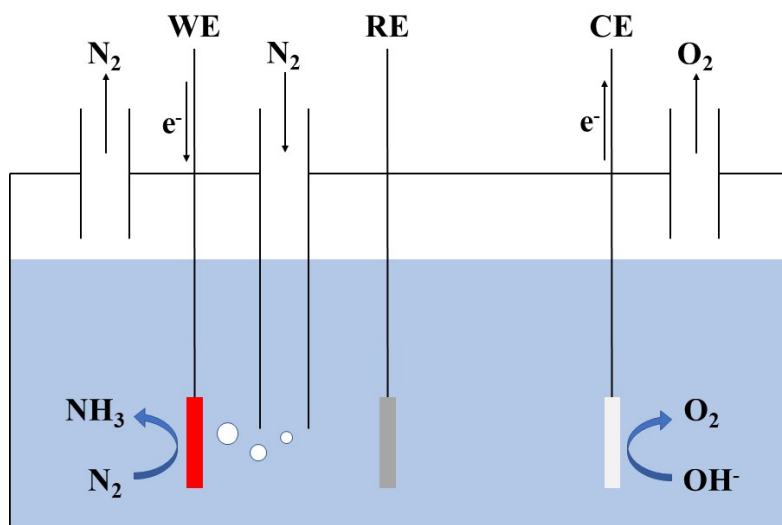

**Fig. S1** Schematic diagram of the experimental cell configuration for electrocatalytic NRR

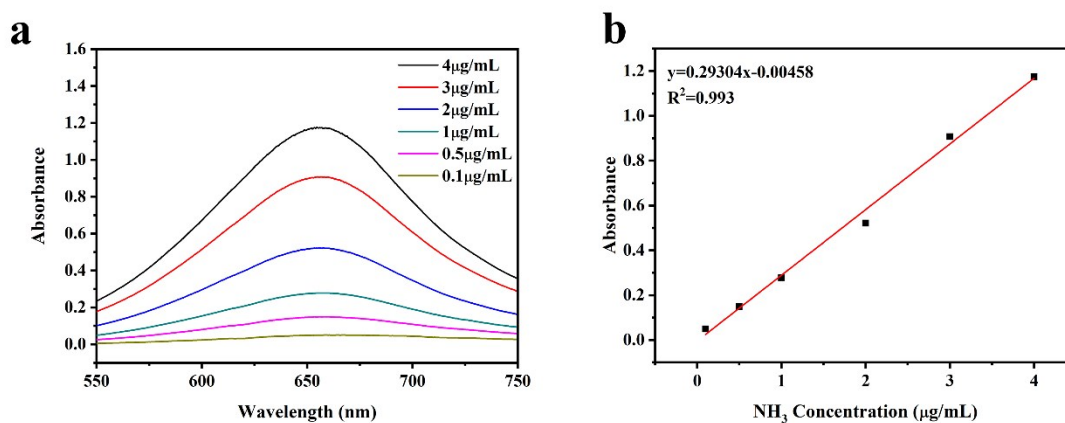

**Fig. S2** UV-vis absorption spectra for standard solutions with different concentrations and calibration curve used for estimation of  $\text{NH}_3$  concentration

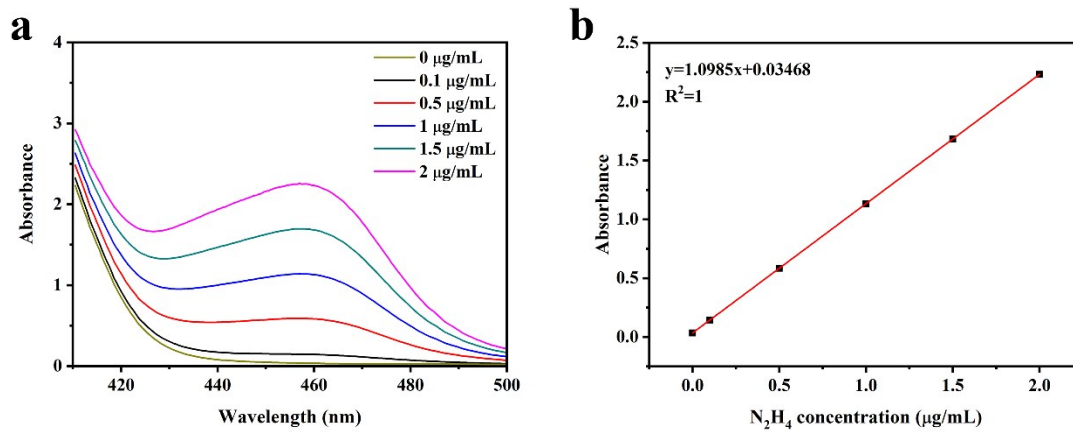

**Fig. S3** UV-vis absorption spectra for standard solutions with different concentrations and calibration curve used for estimation of  $N_2H_4$  concentration

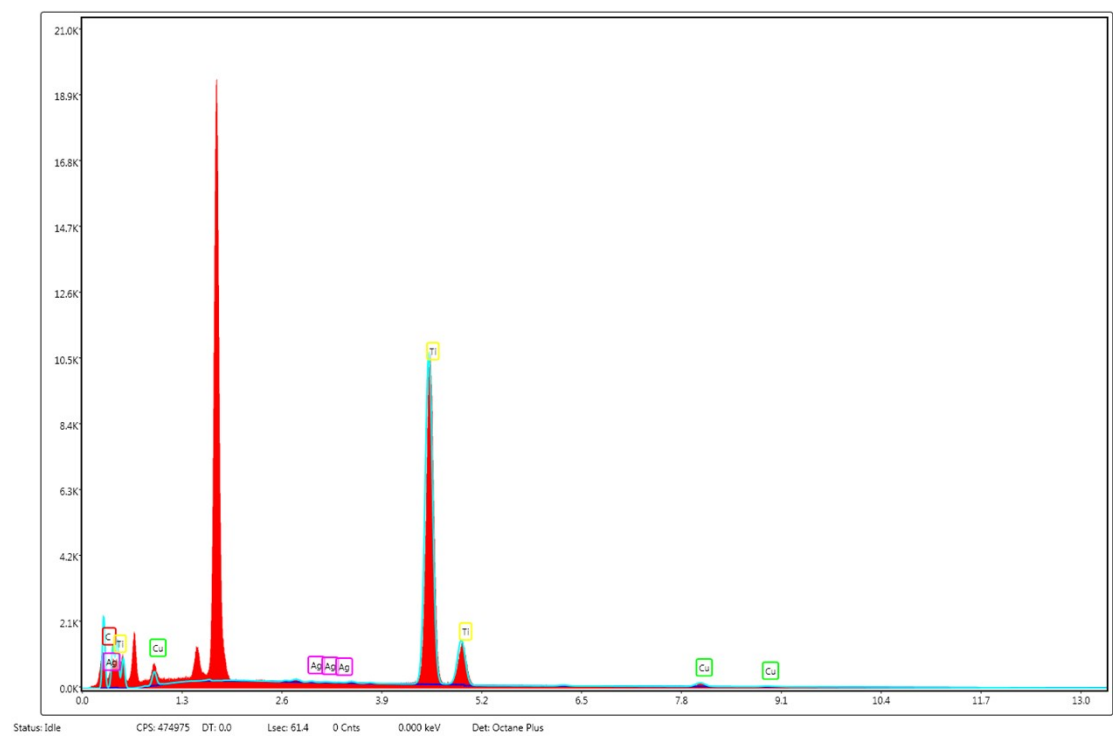

**Fig. S4** EDX spectrum of  $CuAg/Ti_3C_2$  (Cu:Ag = 10:1)

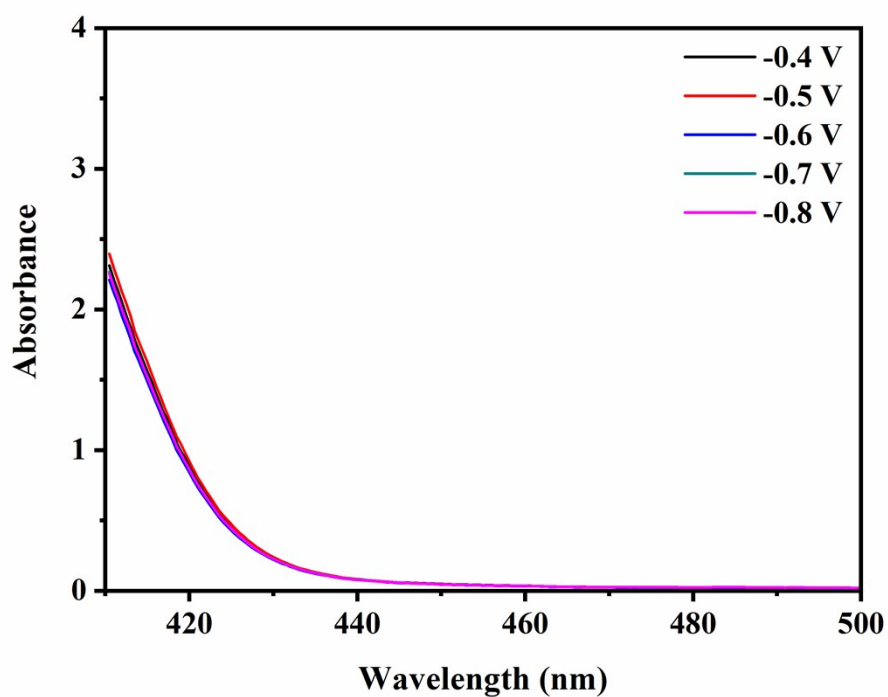

Fig. S5 UV-vis absorption spectra of 0.1 M electrolyte at different potentials

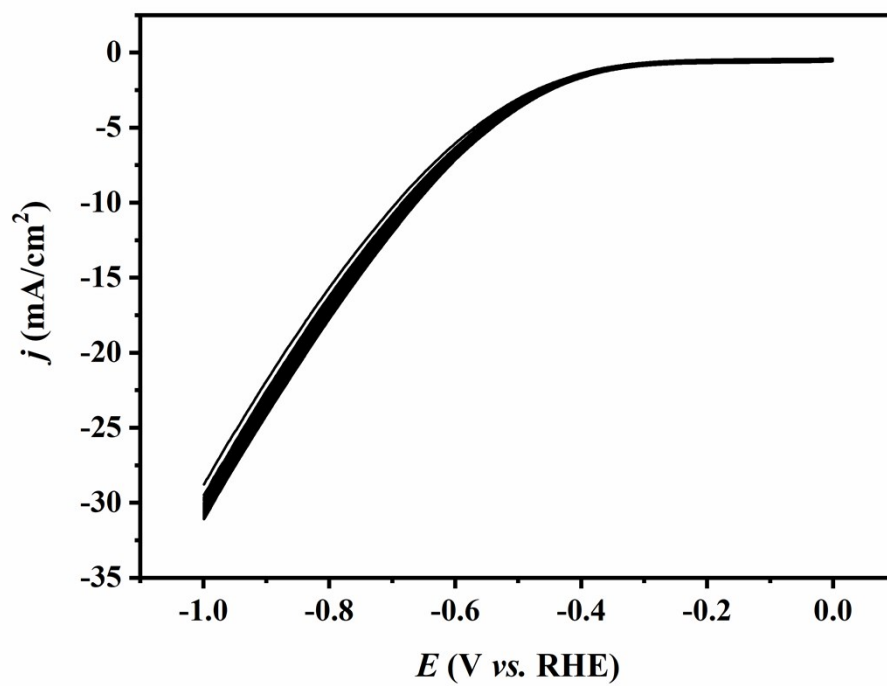

Fig. S6 CV scans of CuAg/Ti<sub>3</sub>C<sub>2</sub> (Cu:Ag=10:1) for 200 cycles

**Table S1.** Comparison of the NRR performances for CuAg/Ti<sub>3</sub>C<sub>2</sub> with published 2D NRR electrocatalysts.

| Catalyst                                      | Electrolyte                           | NH <sub>3</sub> yield                                                                               | FE (%)                   | stability test     | Ref.          |
|-----------------------------------------------|---------------------------------------|-----------------------------------------------------------------------------------------------------|--------------------------|--------------------|---------------|
| B-doped graphene                              | 0.05 M H <sub>2</sub> SO <sub>4</sub> | 9.8 μg cm <sup>-2</sup> h <sup>-1</sup><br>(-0.5 V)                                                 | 10.8<br>(-0.5 V)         | 5 cycles;<br>10 h  | <sup>1</sup>  |
| Bi NS                                         | 0.1 M Na <sub>2</sub> SO <sub>4</sub> | 2.54 μg h <sup>-1</sup> cm <sup>-2</sup><br>(-0.8 V)                                                | 10.46<br>(-0.8 V)        | 6 cycles;<br>25 h  | <sup>2</sup>  |
| BNS                                           | 0.1 M Na <sub>2</sub> SO <sub>4</sub> | 13.22 μg h <sup>-1</sup> mg <sup>-1</sup> <sub>cat</sub><br>(-0.8 V)                                | 4.04<br>(-0.8 V)         | 6 cycles;<br>24 h  | <sup>3</sup>  |
| R-WO <sub>3</sub> NSs                         | 0.1 M HCl                             | 17.28 μg h <sup>-1</sup> mg <sup>-1</sup> <sub>cat</sub><br>(-0.3 V)                                | 7.0<br>(-0.3 V)          | 6 cycles;<br>24 h  | <sup>4</sup>  |
| Ti <sub>3</sub> C <sub>2</sub> T <sub>x</sub> | 0.5 M Li <sub>2</sub> SO <sub>4</sub> | 4.72 μg h <sup>-1</sup> cm <sup>-2</sup><br>(-0.1 V)                                                | 4.62<br>(-0.1 V)         | 6 cycles           | <sup>5</sup>  |
| NV-W <sub>2</sub> N <sub>3</sub>              | 0.1 M KOH                             | 3.80 × 10 <sup>-11</sup> mol cm <sup>-2</sup> s <sup>-1</sup><br>(-0.2 V)                           | 11.67<br>(-0.2 V)        | 12 cycles;<br>10 h | <sup>6</sup>  |
| 2DAS MoO <sub>3-x</sub>                       | 0.1 M KOH                             | 35.83 μg h <sup>-1</sup> mg <sup>-1</sup> <sub>cat</sub><br>(-0.4 V)                                | 12.01<br>(-0.2 V)        | 16 h               | <sup>7</sup>  |
| MoS <sub>2</sub> /CC                          | 0.1 M Na <sub>2</sub> SO <sub>4</sub> | 8.08 × 10 <sup>-11</sup> mol s <sup>-1</sup> cm <sup>-1</sup><br>(-0.5 V)                           | 1.17<br>(-0.5 V)         | 10 cycles;<br>26 h | <sup>8</sup>  |
| MoS <sub>2</sub> /BCCF                        | 0.1 M Li <sub>2</sub> SO <sub>4</sub> | 4.38 × 10 <sup>-10</sup> mol s <sup>-1</sup> cm <sup>-2</sup><br>(-0.2 V)                           | 9.81<br>(-0.2 V)         | 5 cycles;<br>12 h  | <sup>9</sup>  |
| TiO <sub>2</sub> /Ti                          | 0.1 M Na <sub>2</sub> SO <sub>4</sub> | 9.16 × 10 <sup>-11</sup> mol s <sup>-1</sup> cm <sup>-2</sup><br>(-0.7 V)                           | 2.50<br>(-0.7 V)         | 10 cycles;<br>24 h | <sup>10</sup> |
| Ru/2H-MoS <sub>2</sub>                        | 0.01 M HCl                            | 1.14 × 10 <sup>-10</sup> mol s <sup>-1</sup> cm <sup>-2</sup><br>(-0.15 V, 50 °C)                   | 17.6<br>(-0.15 V, 50 °C) | 4 h                | <sup>11</sup> |
| h-BNNS                                        | 0.1 M HCl                             | 22.4 μg h <sup>-1</sup> mg <sup>-1</sup> <sub>cat</sub><br>(-0.75 V)                                | 4.7<br>(-0.75 V)         | 6 cycles;<br>24 h  | <sup>12</sup> |
| Mn <sub>3</sub> O <sub>4</sub> @rGO           | 0.1 M Na <sub>2</sub> SO <sub>4</sub> | 17.4 μg h <sup>-1</sup> mg <sup>-1</sup> <sub>cat</sub><br>(-0.85 V)                                | 3.52<br>(-0.85 V)        | 5 cycles;<br>24 h  | <sup>13</sup> |
| LTO-CP                                        | 0.1 M HCl                             | 25.15 μg h <sup>-1</sup> mg <sup>-1</sup> <sub>cat</sub><br>(-0.55 V)                               | 4.55<br>(-0.55 V)        | 6 cycles;<br>24 h  | <sup>14</sup> |
| VN/TM                                         | 0.1 M HCl                             | 8.40 × 10 <sup>-11</sup> mol s <sup>-1</sup> cm <sup>-2</sup><br>(-0.5 V)                           | 2.25<br>(-0.5 V)         | 10 cycles;<br>8 h  | <sup>15</sup> |
| CuAg/Ti <sub>3</sub> C <sub>2</sub>           | 0.1 M KOH                             | 4.12 μmol cm <sup>-2</sup> h <sup>-1</sup> (70.04 μg cm <sup>-2</sup> h <sup>-1</sup> )<br>(-0.5 V) | 9.77<br>(-0.5 V)         | 5 cycles;<br>12 h  | This work     |

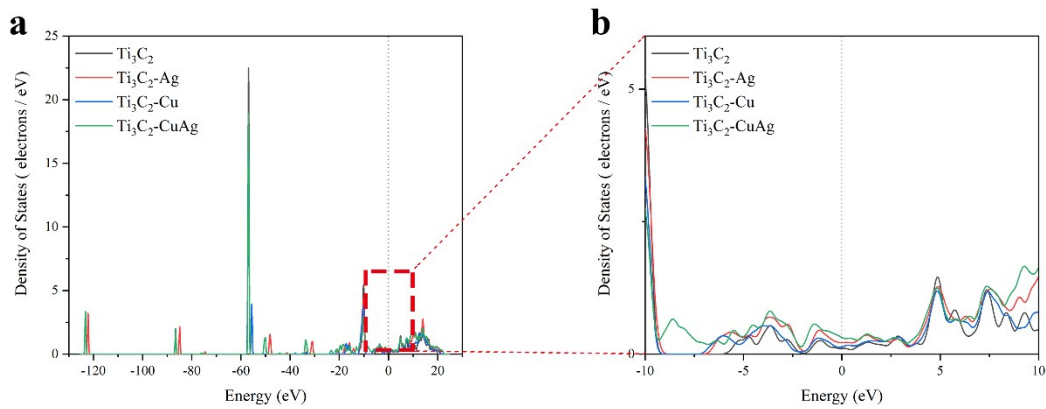

**Fig. S7** s orbit PDOS of  $\text{Ti}_3\text{C}_2$ ,  $\text{Cu}/\text{Ti}_3\text{C}_2$ ,  $\text{Ag}/\text{Ti}_3\text{C}_2$ , and  $\text{CuAg}/\text{Ti}_3\text{C}_2$  composite materials.

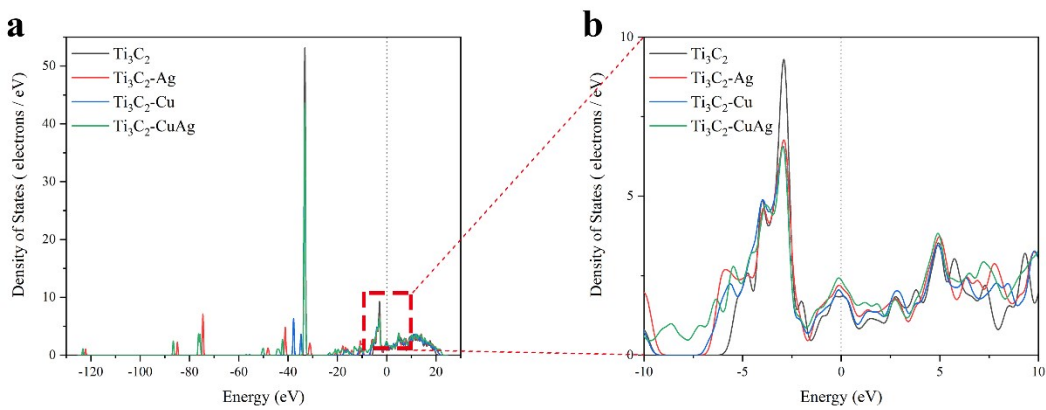

**Fig. S8** p orbit PDOS of  $\text{Ti}_3\text{C}_2$ ,  $\text{Cu}/\text{Ti}_3\text{C}_2$ ,  $\text{Ag}/\text{Ti}_3\text{C}_2$ , and  $\text{CuAg}/\text{Ti}_3\text{C}_2$  composite materials.

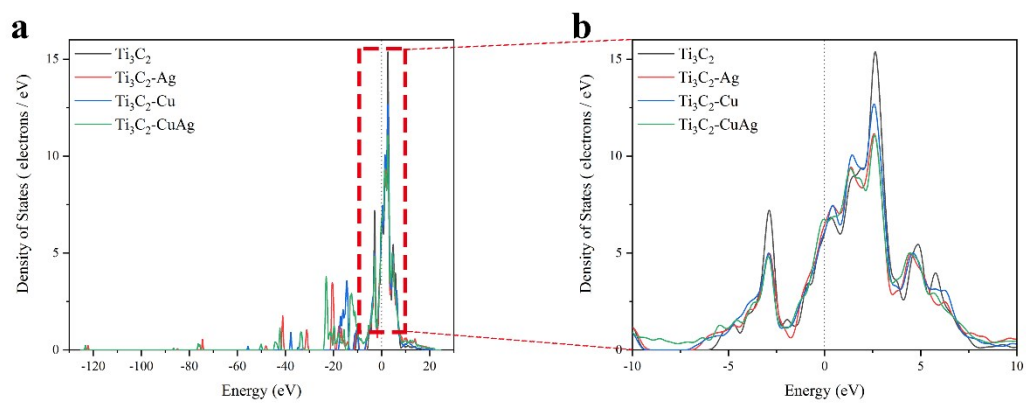

**Fig. S9** d orbit PDOS of  $\text{Ti}_3\text{C}_2$ ,  $\text{Cu}/\text{Ti}_3\text{C}_2$ ,  $\text{Ag}/\text{Ti}_3\text{C}_2$ , and  $\text{CuAg}/\text{Ti}_3\text{C}_2$  composite materials.

## Reference

1. Yu, X.; Han, P.; Wei, Z.; Huang, L.; Gu, Z.; Peng, S.; Ma, J.; Zheng, G., Boron-Doped Graphene for Electrocatalytic N<sub>2</sub> Reduction. *Joule* **2018**, *2* (8), 1610-1622.
2. Li, L.; Tang, C.; Xia, B.; Jin, H.; Zheng, Y.; Qiao, S.-Z., Two-Dimensional Mosaic Bismuth Nanosheets for Highly Selective Ambient Electrocatalytic Nitrogen Reduction. *ACS Catalysis* **2019**, *9* (4), 2902-2908.
3. Zhang, X.; Wu, T.; Wang, H.; Zhao, R.; Chen, H.; Wang, T.; Wei, P.; Luo, Y.; Zhang, Y.; Sun, X., Boron Nanosheet: An Elemental Two-Dimensional (2D) Material for Ambient Electrocatalytic N<sub>2</sub>-to-NH<sub>3</sub> Fixation in Neutral Media. *ACS Catalysis* **2019**, *9* (5), 4609-4615.
4. Kong, W.; Zhang, R.; Zhang, X.; Ji, L.; Yu, G.; Wang, T.; Luo, Y.; Shi, X.; Xu, Y.; Sun, X., WO<sub>3</sub> nanosheets rich in oxygen vacancies for enhanced electrocatalytic N<sub>2</sub> reduction to NH<sub>3</sub>. *Nanoscale* **2019**, *11* (41), 19274-19277.
5. Luo, Y.; Chen, G.-F.; Ding, L.; Chen, X.; Ding, L.-X.; Wang, H., Efficient Electrocatalytic N<sub>2</sub> Fixation with MXene under Ambient Conditions. *Joule* **2019**, *3* (1), 279-289.
6. Jin, H.; Li, L.; Liu, X.; Tang, C.; Xu, W.; Chen, S.; Song, L.; Zheng, Y.; Qiao, S.-Z., Nitrogen Vacancies on 2D Layered W<sub>2</sub>N<sub>3</sub>: A Stable and Efficient Active Site for Nitrogen Reduction Reaction. *Advanced Materials* **2019**, *31* (32), 1902709.
7. Liu, W.; Li, C.; Xu, Q.; Yan, P.; Niu, C.; Shen, Y.; Yuan, P.; Jia, Y., Anderson Localization in 2D Amorphous MoO<sub>3-x</sub> Monolayers for Electrochemical Ammonia Synthesis. *ChemCatChem* **2019**, *n/a* (n/a).
8. Zhang, L.; Ji, X.; Ren, X.; Ma, Y.; Shi, X.; Tian, Z.; Asiri, A. M.; Chen, L.; Tang, B.; Sun, X., Electrochemical Ammonia Synthesis via Nitrogen Reduction Reaction on a MoS<sub>2</sub> Catalyst: Theoretical and Experimental Studies. *Advanced Materials* **2018**, *30* (28), 1800191.
9. Liu, Y.; Han, M.; Xiong, Q.; Zhang, S.; Zhao, C.; Gong, W.; Wang, G.; Zhang, H.; Zhao, H., Dramatically Enhanced Ambient Ammonia Electrosynthesis Performance by In-Operando Created Li-S Interactions on MoS<sub>2</sub> Electrocatalyst. *Advanced Energy Materials* **2019**, *9* (14), 1803935.
10. Zhang, R.; Ren, X.; Shi, X. F.; Xie, F. Y.; Zheng, B. Z.; Guo, X. D.; Sun, X. P., Enabling Effective Electrocatalytic N<sub>2</sub> Conversion to NH<sub>3</sub> by the TiO<sub>2</sub> Nanosheets Array under Ambient Conditions. *Acs Applied Materials & Interfaces* **2018**, *10* (34), 28251-28255.

11. Suryanto, B. H. R.; Wang, D.; Azofra, L. M.; Harb, M.; Cavallo, L.; Jalili, R.; Mitchell, D. R. G.; Chatti, M.; MacFarlane, D. R., MoS<sub>2</sub> Polymorphic Engineering Enhances Selectivity in the Electrochemical Reduction of Nitrogen to Ammonia. *ACS Energy Letters* **2019**, *4* (2), 430-435.
12. Zhang, Y.; Du, H.; Ma, Y.; Ji, L.; Guo, H.; Tian, Z.; Chen, H.; Huang, H.; Cui, G.; Asiri, A. M.; Qu, F.; Chen, L.; Sun, X., Hexagonal boron nitride nanosheet for effective ambient N<sub>2</sub> fixation to NH<sub>3</sub>. *Nano Research* **2019**, *12* (4), 919-924.
13. Huang, H.; Gong, F.; Wang, Y.; Wang, H.; Wu, X.; Lu, W.; Zhao, R.; Chen, H.; Shi, X.; Asiri, A. M.; Li, T.; Liu, Q.; Sun, X., Mn<sub>3</sub>O<sub>4</sub> nanoparticles@reduced graphene oxide composite: An efficient electrocatalyst for artificial N<sub>2</sub> fixation to NH<sub>3</sub> at ambient conditions. *Nano Research* **2019**, *12* (5), 1093-1098.
14. Yu, J.; Li, C.; Li, B.; Zhu, X.; Zhang, R.; Ji, L.; Tang, D.; Asiri, A. M.; Sun, X.; Li, Q.; Liu, S.; Luo, Y., A perovskite La<sub>2</sub>Ti<sub>2</sub>O<sub>7</sub> nanosheet as an efficient electrocatalyst for artificial N<sub>2</sub> fixation to NH<sub>3</sub> in acidic media. *Chemical Communications* **2019**, *55* (45), 6401-6404.
15. Zhang, R.; Zhang, Y.; Ren, X.; Cui, G.; Asiri, A. M.; Zheng, B.; Sun, X., High-Efficiency Electrosynthesis of Ammonia with High Selectivity under Ambient Conditions Enabled by VN Nanosheet Array. *ACS Sustainable Chemistry & Engineering* **2018**, *6* (8), 9545-9549.
